# Supplementary material for: Magnetic orientation of migratory robins, Erithacus rubecula, under long-wavelength light
Source: Oxford University Press journal article supplement (doi:10.1242/jeb.059212), 2011-08-24
Supplement: jeb059212tables1.pdf [file jeb059212tables1.pdf]

Table S1. Mean vectors of individual birds, autumn experiments

| 2006  | G    |      |                   | RpeR  |      |                   | 2007  | G     |      |                   | RpeR       |       |                   |
|-------|------|------|-------------------|-------|------|-------------------|-------|-------|------|-------------------|------------|-------|-------------------|
|       | Bird | n    | $\alpha_b$        | $r_b$ | n    | $\alpha_b$        |       | $r_b$ | Bird | n                 | $\alpha_b$ | $r_b$ | n                 |
| 06-2  | 3    | 220° | 0.56              | 3     | 125° | 0.77              | 07-2  | 3     | 180° | 0.90              | 3          | 15°   | 0.99 <sup>A</sup> |
| 06-3  | 3    | 94°  | 0.83              | 3     | 73°  | 0.52              | 07-5  | 3     | 144° | 0.94              | 3          | 190°  | 1.00 <sup>A</sup> |
| 06-6  | 3    | 128° | 0.50              | 3     | 168° | 0.50              | 07-6  | 3     | 210° | 0.97              | 3          | 13°   | 0.95 <sup>A</sup> |
| 06-7  | 2    | 75°  | 0.97              | 3     | 101° | 0.85              | 07-11 | 3     | 209° | 0.94              | 3          | 349°  | 0.81 <sup>A</sup> |
| 06-8  | 3    | 65°  | 0.96              | 2     | 202° | 0.98              | 07-22 | 3     | 182° | 0.58 <sup>A</sup> | 3          | 30°   | 1.00              |
| 06-9  | 3    | 288° | 0.63              | 3     | 164° | 0.50              | 07-32 | 3     | 160° | 0.85              | 3          | 13°   | 0.99              |
| 06-10 | 3    | 228° | 0.92              | 3     | 76°  | 0.75              | 07-33 | 3     | 176° | 0.75 <sup>A</sup> | 3          | 337°  | 0.86              |
| 06-11 | 3    | 197° | 0.83              | 3     | 68°  | 0.49              | 07-36 | 3     | 191° | 0.88 <sup>A</sup> | 3          | 19°   | 0.91              |
| 06-13 | 3    | 360° | 0.98 <sup>A</sup> | 3     | 213° | 0.73 <sup>A</sup> | 07-39 | 3     | 185° | 0.95 <sup>A</sup> | 3          | 189°  | 0.95              |
| 06-15 | 3    | 184° | 0.48              | 3     | 171° | 0.97 <sup>A</sup> | 07-41 | 3     | 172° | 0.96 <sup>A</sup> | 3          | 9°    | 0.68 <sup>A</sup> |
| 06-16 | 3    | 194° | 0.87              | 3     | 229° | 0.45 <sup>A</sup> | 07-44 | 3     | 179° | 0.98              | 3          | 178°  | 0.95 <sup>A</sup> |
| 06-17 | 3    | 182° | 0.68 <sup>A</sup> | 3     | 3°   | 0.99 <sup>A</sup> | 07-46 | 3     | 151° | 0.97              | 3          | 171°  | 0.37 <sup>A</sup> |
| 06-18 | 3    | 227° | 0.54              | 3     | 219° | 0.62              | 07-47 | 3     | 334° | 0.97 <sup>A</sup> | 3          | 37°   | 0.77 <sup>A</sup> |
| 06-19 | 3    | 246° | 0.89              | 3     | 145° | 0.98              | 07-48 | 3     | 213° | 0.99              | 3          | 6°    | 0.43              |
| 06-22 | 3    | 257° | 0.58              | 2     | 171° | 0.87              | 07-49 | 3     | 120° | 1.00              | 3          | 226°  | 0.23 <sup>A</sup> |
| 06-23 | 3    | 110° | 0.47              | 3     | 122° | 0.26 <sup>A</sup> | 07-50 | 3     | 164° | 0.72              | 3          | 195°  | 0.38 <sup>A</sup> |

| 2010  | G    |      |                   | YpeY  |      |                   |
|-------|------|------|-------------------|-------|------|-------------------|
|       | Bird | n    | $\alpha_b$        | $r_b$ | n    | $\alpha_b$        |
| 10-1  | 3    | 229° | 0.82              | 3     | 349° | 0.69              |
| 10-2  | 3    | 262° | 0.53              | 3     | 13°  | 0.55 <sup>A</sup> |
| 10-3  | 3    | 184° | 0.90              | 3     | 45°  | 0.61 <sup>A</sup> |
| 10-4  | 2    | 204° | 0.75              | 3     | 97°  | 0.77 <sup>A</sup> |
| 10-5  | 3    | 162° | 0.97 <sup>A</sup> | 3     | 283° | 0.92              |
| 10-6  | 3    | 178° | 0.81              | 3     | 347° | 0.67              |
| 10-7  | 3    | 192° | 0.57              | 3     | 191° | 0.93 <sup>A</sup> |
| 10-8  | 3    | 235° | 0.59 <sup>A</sup> | 3     | 181° | 0.92 <sup>A</sup> |
| 10-9  | 3    | 291° | 0.56 <sup>A</sup> | 3     | 9°   | 0.71 <sup>A</sup> |
| 10-10 | 3    | 197° | 0.68 <sup>A</sup> | 3     | 334° | 0.39              |
| 10-14 | 3    | 292° | 0.60 <sup>A</sup> | 3     | 348° | 0.97 <sup>A</sup> |
| 10-15 | 3    | 186° | 0.67              | 3     | 349° | 0.63              |
| 10-16 | 3    | 343° | 0.52 <sup>A</sup> | 2     | 348° | 0.97              |
| 10-17 | 3    | 97°  | 0.27 <sup>A</sup> | 3     | 34°  | 0.54 <sup>A</sup> |
| 10-18 | 3    | 332° | 0.79 <sup>A</sup> | 3     | 68°  | 0.35              |
| 10-19 | 3    | 215° | 0.86              | 3     | 312° | 0.87              |

n, number of recordings  
 $\alpha_b$ ,  $r_b$ , direction and length of the birds' mean vectors, with <sup>A</sup> indicating the preferred end of an axis (see text)

*Test conditions:*

All experiments took place in the local geomagnetic field

G 565 nm green light (Control)

RpeR 645 nm red light, after 1 h pre-exposure to red light

YpeY 582 nm yellow light, 1.8 mW/m<sup>2</sup> after 1 h pre-exposure to yellow light
