# Supplementary material for: Magnetic orientation of migratory robins, Erithacus rubecula, under long-wavelength light
Source: Oxford University Press journal article supplement (doi:10.1242/jeb.059212), 2011-08-24
Supplement: jeb059212tables2.pdf [file jeb059212tables2.pdf]

Table S2. Mean vectors of individual birds, spring experiments

| 2006  | G    |      |                   | RpeR  |      |                   | RpeR HF 480 |      |                   |
|-------|------|------|-------------------|-------|------|-------------------|-------------|------|-------------------|
|       | Bird | n    | $\alpha_b$        | $r_b$ | n    | $\alpha_b$        | $r_b$       | n    | $\alpha_b$        |
| 05-25 | 3    | 24°  | 0.89 <sup>A</sup> | 3     | 52°  | 0.90              | 3           | 18°  | 0.99              |
| 05-26 | 3    | 5°   | 0.87 <sup>A</sup> | 3     | 35°  | 0.96              | 3           | 322° | 0.80              |
| 05-29 | 3    | 15°  | 0.98              | 2     | 31°  | 0.98              | 3           | 26°  | 0.76              |
| 05-30 | 3    | 12°  | 0.77 <sup>A</sup> | 3     | 24°  | 1.00              | 3           | 38°  | 0.84              |
| 05-34 | 3    | 356° | 0.96              | 3     | 356° | 0.94              | 3           | 25°  | 0.80              |
| 05-36 | 3    | 341° | 0.99              | 3     | 10°  | 0.87              | 3           | 344° | 0.88              |
| 05-37 | 3    | 27°  | 0.98              | 3     | 8°   | 0.95              | 3           | 335° | 0.41              |
| 05-39 | 3    | 53°  | 0.91              | 3     | 320° | 0.52              | 3           | 333° | 0.60 <sup>A</sup> |
| 05-42 | 3    | 40°  | 0.75              | 3     | 332° | 0.88              | 3           | 5°   | 0.89              |
| 05-43 | 3    | 1°   | 0.97              | 3     | 358° | 0.96              | 3           | 339° | 0.87              |
| 05-46 | 3    | 319° | 0.65              | 3     | 340° | 0.97              | 3           | 48°  | 0.89              |
| 05-47 | 3    | 51°  | 0.59              | 3     | 317° | 0.75 <sup>A</sup> | 3           | 61°  | 0.76              |

| 2007  | G    |     |                   | RpeR  |      |                   | RpeR -V |      |                   | RpeR HF 4800 |      |                   | RpeR Xy |      |                   |
|-------|------|-----|-------------------|-------|------|-------------------|---------|------|-------------------|--------------|------|-------------------|---------|------|-------------------|
|       | Bird | n   | $\alpha_b$        | $r_b$ | n    | $\alpha_b$        | $r_b$   | n    | $\alpha_b$        | $r_b$        | n    | $\alpha_b$        | $r_b$   | n    | $\alpha_b$        |
| 06-2  | 1    | 45° | (1.00)            | 3     | 5°   | 0.95              | 3       | 356° | 0.86              | 2            | 107° | 0.55              | 2       | 125° | 0.98              |
| 06-3  | 3    | 16° | 0.99              | 2     | 55°  | 1.00              | 3       | 299° | 0.32 <sup>A</sup> | 3            | 344° | 0.85              | 3       | 24°  | 0.63              |
| 06-9  | 3    | 18° | 0.73 <sup>A</sup> | 3     | 1°   | 0.80 <sup>A</sup> | 3       | 1°   | 0.94              | 3            | 353° | 0.59 <sup>A</sup> | 3       | 297° | 0.60              |
| 06-10 | 2    | 33° | 0.91 <sup>A</sup> | 2     | 20°  | 0.95              | 2       | 21°  | 0.95              | 3            | 21°  | 0.97 <sup>A</sup> | 2       | 241° | 0.64 <sup>A</sup> |
| 06-11 | 3    | 38° | 1.00              | 3     | 232° | 0.73 <sup>A</sup> | 3       | 29°  | 0.94 <sup>A</sup> | 3            | 307° | 0.37              | 3       | 353° | 0.77              |
| 06-17 | 3    | 56° | 0.56              | 3     | 346° | 0.92              | 3       | 10°  | 0.86              | 3            | 29°  | 0.70 <sup>A</sup> | 3       | 326° | 0.84 <sup>A</sup> |
| 06-18 | 3    | 31° | 0.98              | 3     | 359° | 0.97              | 3       | 3°   | 0.71 <sup>A</sup> | 3            | 5°   | 0.64              | 3       | 138° | 0.97 <sup>A</sup> |
| 06-19 | 2    | 56° | 0.52 <sup>A</sup> | 2     | 8°   | 0.99              | 1       | 350° | (1.00)            | 2            | 25°  | 1.00              | 1       | 58°  | (1.00)            |
| 06-23 | 3    | 3°  | 0.97              | 3     | 25°  | 0.99              | 3       | 30°  | 0.96              | 3            | 49°  | 0.98              | 3       | 277° | 0.48              |
| 06-24 | 3    | 1°  | 0.98              | 3     | 37°  | 0.65 <sup>A</sup> | 3       | 357° | 0.77              | 3            | 7°   | 0.95              | 3       | 109° | 0.64              |
| 06-25 | 3    | 14° | 0.99              | 3     | 29°  | 0.82 <sup>A</sup> | 3       | 281° | 0.62              | 3            | 326° | 0.58              | 3       | 270° | 0.67 <sup>A</sup> |
| 06-26 | 3    | 20° | 0.92              | 3     | 344° | 0.61 <sup>A</sup> | 3       | 224° | 0.80              | 3            | 13°  | 0.88              | 3       | 39°  | 0.88              |

n, number of recordings

$\alpha_b$ ,  $r_b$ , direction and length of the birds' mean vector, with <sup>A</sup> indicating a preferred end of an axis (see text)

*Test conditions:*

G 565 nm green light (control)

RpeR 645 nm red light, after 1 h pre-exposure in red light

RpeR-V 645 nm red light as above, vertical component of the magnetic field inverted

RpeR HF 480 645 nm red light, as above, with a high frequency field of 1.315 MHz, 480 nT added

RpeR HF 4800 645 nm red light as above with a high frequency field of 1.315 MHz, 4800 nT added

RpeR Xy 645 nm red light, after 1 h pre-exposure in red light, beak locally anesthetized with Xylocain

Table S2, continued: Mean vectors of individual birds, spring experiments

| 2010 |   | G          |                   | YpeY |            |       | YpeY-V |            |                   | YpeY-H |            |                   |
|------|---|------------|-------------------|------|------------|-------|--------|------------|-------------------|--------|------------|-------------------|
| Bird | n | $\alpha_b$ | $r_b$             | n    | $\alpha_b$ | $r_b$ | n      | $\alpha_b$ | $r_b$             | n      | $\alpha_b$ | $r_b$             |
| 1    | 3 | 327°       | 0.98              | 3    | 329°       | 0.61  | 3      | 12°        | 0.98              | 3      | 142°       | 0.95              |
| 2    | 3 | 360°       | 0.99              | 3    | 7°         | 1.00  | 3      | 212°       | 0.07 <sup>A</sup> | 3      | 212°       | 0.99              |
| 3    | 3 | 9°         | 0.84              | 3    | 1°         | 0.99  | 3      | 353°       | 0.87 <sup>A</sup> | 3      | 158°       | 0.91              |
| 4    | 3 | 3°         | 0.95              | 3    | 224°       | 0.76  | 3      | 2°         | 0.83              | 3      | 252°       | 0.69              |
| 7    | 3 | 18°        | 0.98              | 3    | 51°        | 0.89  | 3      | 150°       | 0.65              | 3      | 150°       | 0.50              |
| 9    | 3 | 5°         | 0.87              | 3    | 358°       | 0.98  | 3      | 339°       | 0.70 <sup>A</sup> | 3      | 133°       | 0.79              |
| 10   | 3 | 360°       | 0.98              | 3    | 4°         | 0.81  | 3      | 7°         | 0.77              | 3      | 154°       | 0.99              |
| 12   | 3 | 22°        | 0.87              | 3    | 26°        | 0.98  | 3      | 359°       | 0.99 <sup>A</sup> | 3      | 144°       | 0.84 <sup>A</sup> |
| 13   | 3 | 9°         | 0.92              | 3    | 43°        | 0.60  | 3      | 312°       | 0.62              | 3      | 164°       | 0.80              |
| 14   | 3 | 45°        | 0.81 <sup>A</sup> | 3    | 61°        | 0.90  | 3      | 258°       | 0.51              | 3      | 214°       | 1.00 <sup>A</sup> |
| 16   | 3 | 7°         | 0.95              | 3    | 10°        | 0.99  | 3      | 12°        | 0.86 <sup>A</sup> | 3      | 174°       | 0.92 <sup>A</sup> |
| 27   | 3 | 2°         | 0.93              | 3    | 337°       | 0.53  | 3      | 21°        | 1.00              | 3      | 196°       | 1.00              |

| 2010 |   | YpeY HF    |                   | YpeY Xy |            |                   |
|------|---|------------|-------------------|---------|------------|-------------------|
| Bird | n | $\alpha_b$ | $r_b$             | n       | $\alpha_b$ | $r_b$             |
| 1    | 3 | 358°       | 0.85              | 3       | 168°       | 0.97 <sup>A</sup> |
| 2    | 3 | 14°        | 0.97 <sup>A</sup> | 3       | 217°       | 0.07 <sup>A</sup> |
| 3    | 3 | 204°       | 0.98              | 3       | 340°       | 0.31 <sup>A</sup> |
| 4    | 3 | 326°       | 0.56              | 3       | 262°       | 0.44 <sup>A</sup> |
| 7    | 3 | 282°       | 0.54              | 3       | 335°       | 0.86 <sup>A</sup> |
| 9    | 3 | 8°         | 0.86 <sup>A</sup> | 3       | 194°       | 0.97 <sup>A</sup> |
| 10   | 3 | 346°       | 0.68 <sup>A</sup> | 3       | 32°        | 0.79              |
| 12   | 3 | 201°       | 0.88              | 3       | 332°       | 0.91              |
| 13   | 3 | 46°        | 0.42 <sup>A</sup> | 3       | 233°       | 0.77 <sup>A</sup> |
| 14   | 3 | 334°       | 0.83              | 3       | 51°        | 0.75              |
| 16   | 3 | 14°        | 0.88              | 3       | 130°       | 0.92              |
| 27   | 3 | 23°        | 0.80              | 3       | 153°       | 0.73              |

n, number of recordings  
 $\alpha_b$ ,  $r_b$ , direction and length of the birds' mean vector, with <sup>A</sup> indicating a preferred end of an axis (see text)

*Test conditions:*

G 565 nm green light (control)  
YpeY 582 nm yellow light, after 1 h pre-exposure in yellow light  
YpeY-V yellow light as above, vertical component of the magnetic field inverted  
YpeY-H yellow light as above, horizontal component reversed  
YpeY HF yellow light as above, a high frequency field of 1.315 MHz, 480 nT added  
YpeY Xy yellow light as above, beak locally anesthetized with Xylocain
